# Supplementary material for: Loss of disease tolerance during Citrobacter rodentium infection is associated with impaired epithelial differentiation and hyperactivation of T cell responses
Source: PubMed Central journal article supplement (PMC5770458; doi:10.1038/s41598-017-17386-y), 2018-01-16
Supplement: 41598_2017_17386_MOESM1_ESM.pdf [file 41598_2017_17386_MOESM1_ESM.pdf]

## Supplementary Information

### **Loss of disease tolerance during *Citrobacter rodentium* infection is associated with impaired epithelial differentiation and hyperactivation of T cell responses**

Eugene Kang<sup>1,2</sup>, Guangyan Zhou<sup>3</sup>, Mitra Yousefi<sup>1,2</sup>, Romain Cayrol<sup>4</sup>, Jianguo Xia<sup>1,3,5</sup>, Samantha Gruenheid<sup>1,2\*</sup>

## Supplementary Figure

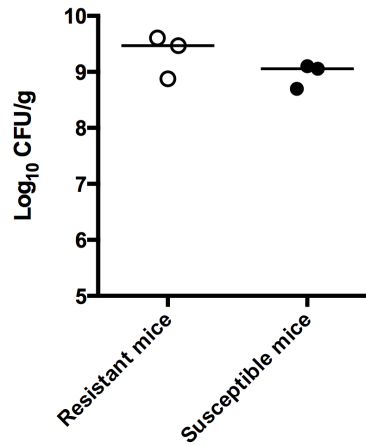

**Supplementary Figure S1. Bacterial loads are identical in susceptible and resistant congenic mice at 9 days post-infection.** Fecal pellets were collected at day 9 post-infection and bacterial counts were determined by plating of serial dilutions on MacConkey agar (n=3). Bacterial counts were log<sub>10</sub> transformed. Bars indicate median values.

## Supplementary Figure

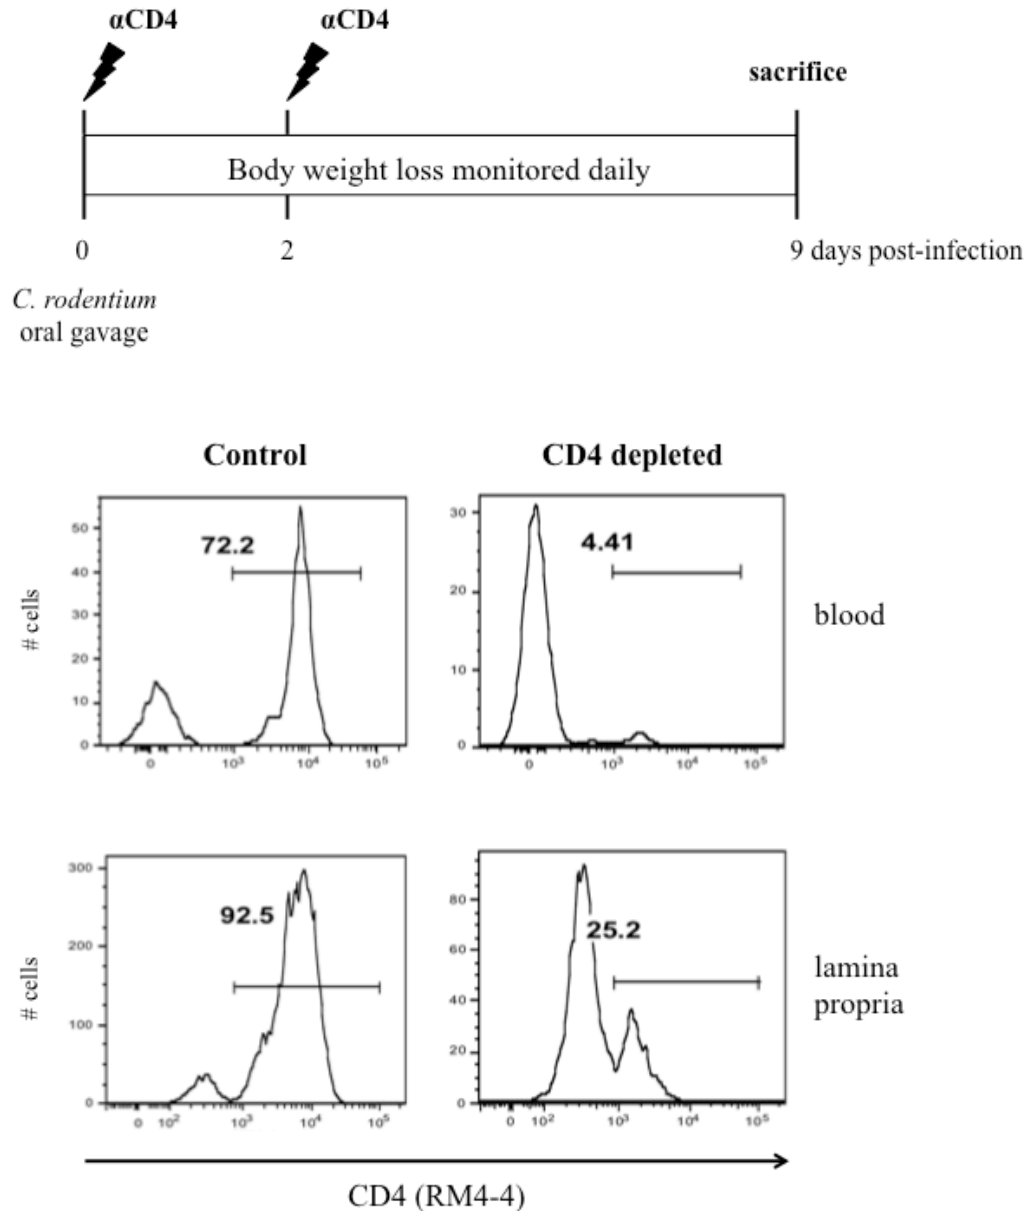

**Supplementary Figure S2. Schematic diagram of the *in vivo* CD4<sup>+</sup> T cell depletion and efficacy of depletion in the blood and colonic lamina propria as measured by flow cytometry.** Mice (n=6 per group) were administered 200  $\mu$ g of either GK1.5 or control LTF-2 intraperitoneally on the day of oral infection with *C. rodentium* and again on day 2 post-infection before sacrifice on day 9 post-infection. Blood was collected via tail incisions just prior to sacrifice while colonic lamina propria cells were harvested upon sacrifice as described in the main article. Cells were gated on live, singlet CD45<sup>+</sup> and TCR $\beta$ <sup>+</sup> and subsequently on CD4 (noncompeting clone RM4-4). Representative histograms of the depletion are shown for blood and colonic lamina propria.

## Supplementary Table

| <b>ID</b> | <b>P-value</b> | <b>Description</b>                      |
|-----------|----------------|-----------------------------------------|
| mmu04657  | 1.48E-09       | IL-17 signaling pathway                 |
| mmu04060  | 2.91E-09       | Cytokine-cytokine receptor interaction  |
| mmu04080  | 4.25E-08       | Neuroactive ligand-receptor interaction |
| mmu04726  | 7.46E-06       | Serotonergic synapse                    |
| mmu00140  | 2.36E-03       | Steroid hormone biosynthesis            |
| mmu00591  | 2.36E-03       | Linoleic acid metabolism                |
| mmu00590  | 2.64E-03       | Arachidonic acid metabolism             |
| mmu04972  | 3.67E-03       | Pancreatic secretion                    |
| mmu04020  | 9.28E-03       | Calcium signaling pathway               |
| mmu04668  | 1.50E-02       | TNF signaling pathway                   |

**Supplementary Table S1. Top ten statistically over-represented KEGG pathway terms in susceptible and resistant congenic mice in response to *C. rodentium* infection.**

## Supplementary Table

| GO ID      | P-value  | Description                                  |
|------------|----------|----------------------------------------------|
| GO:0007267 | 7.97E-13 | cell-cell signaling                          |
| GO:0007610 | 2.02E-12 | behavior                                     |
| GO:0006811 | 2.11E-12 | ion transport                                |
| GO:0007186 | 4.99E-12 | G-protein coupled receptor signaling pathway |
| GO:0050877 | 7.35E-11 | neurological system process                  |
| GO:0042221 | 9.21E-10 | response to chemical                         |
| GO:0099536 | 2.80E-09 | synaptic signaling                           |
| GO:0019369 | 5.29E-09 | arachidonic acid metabolic process           |
| GO:0034097 | 6.70E-09 | response to cytokine                         |
| GO:0006952 | 9.81E-09 | defence response                             |

**Supplementary Table S2. Top over-represented GO biological processes in susceptible and resistant congenic mice in response to *C. rodentium* infection.**

## Supplementary Table

| <b>ID</b> | <b>P-value</b> | <b>Description</b>                           |
|-----------|----------------|----------------------------------------------|
| mmu05310  | 6.58E-05       | Asthma                                       |
| mmu04514  | 8.29E-05       | Cell adhesion molecules (CAMs)               |
| mmu05321  | 8.24E-04       | Inflammatory bowel disease (IBD)             |
| mmu04672  | 8.24E-04       | Intestinal immune network for IgA production |
| mmu04659  | 1.05E-03       | Th17 cell differentiation                    |
| mmu04658  | 1.46E-03       | Th1 and Th2 cell differentiation             |
| mmu05150  | 1.57E-03       | Staphylococcus aureus infection              |
| mmu04612  | 1.57E-03       | Antigen processing and presentation          |
| mmu04640  | 1.96E-03       | Hematopoietic cell lineage                   |
| mmu05323  | 3.78E-03       | Rheumatoid arthritis                         |

**Supplementary Table S3. Top ten statistically over-represented KEGG pathway terms in infected susceptible mice compared to resistant congenic mice.**

## Supplementary Table

| GO ID      | P-value  | Description                                                                       |
|------------|----------|-----------------------------------------------------------------------------------|
| GO:0019886 | 1.82E-10 | antigen processing and presentation of exogenous peptide antigen via MHC class II |
| GO:0009605 | 6.83E-09 | response to external stimulus                                                     |
| GO:0010817 | 1.51E-08 | regulation of hormone levels                                                      |
| GO:0051239 | 2.49E-07 | regulation of multicellular organismal process                                    |
| GO:0006954 | 2.90E-07 | inflammatory response                                                             |
| GO:0007610 | 6.64E-07 | behavior                                                                          |
| GO:0009611 | 8.73E-07 | response to wounding                                                              |
| GO:0042127 | 9.38E-07 | regulation of cell proliferation                                                  |
| GO:0006935 | 1.36E-06 | chemotaxis                                                                        |
| GO:0007155 | 5.86E-06 | cell adhesion                                                                     |

**Supplementary Table S4. Top over-represented GO biological processes in infected susceptible mice compared to resistant congenic mice.**

## Supplementary Table

| Top 20 Up-regulated Genes |           |                                                                          | Top 20 Down-regulated Genes |           |                                                                    |
|---------------------------|-----------|--------------------------------------------------------------------------|-----------------------------|-----------|--------------------------------------------------------------------|
| Symbol                    | P-value   | Name                                                                     | Symbol                      | P-value   | Name                                                               |
| Neto2                     | 0         | neuropilin and tolloid-like 2                                            | Gm12551                     | 2.25E-135 | predicted gene 12551                                               |
| Tgm2                      | 0         | transglutaminase 2, C polypeptide                                        | Slc4a4                      | 1.03E-130 | solute carrier family 4, member 4                                  |
| Pdpn                      | 0         | podoplanin                                                               | Sycn                        | 7.76E-127 | syncollin                                                          |
| S100a11                   | 0         | S100 calcium binding protein A11 (calgizzarin)                           | Syn2                        | 8.45E-120 | synapsin II                                                        |
| Mfsd2a                    | 6.63E-298 | major facilitator superfamily domain containing 2A                       | Edil3                       | 9.14E-111 | EGF-like repeats and discoidin I-like domains 3                    |
| Hsp90aa1                  | 1.25E-279 | heat shock protein 90, alpha (cytosolic), class A member 1               | Trpv3                       | 2.91E-106 | transient receptor potential cation channel, subfamily V, member 3 |
| Atp1b2                    | 1.54E-257 | ATPase, Na <sup>+</sup> /K <sup>+</sup> transporting, beta 2 polypeptide | Iyd                         | 5.60E-105 | iodotyrosine deiodinase                                            |
| Cebpb                     | 1.77E-179 | CCAAT/enhancer binding protein (C/EBP), beta                             | Tppp                        | 5.75E-104 | tubulin polymerization promoting protein                           |
| P4ha1                     | 4.88E-167 | procollagen-proline, proline 4-hydroxylase, alpha 1                      | Fam189a2                    | 3.23E-102 | family with sequence similarity 189, member A2                     |
| Uck2                      | 1.78E-160 | uridine-cytidine kinase 2                                                | Col6a4                      | 5.90E-102 | collagen, type VI, alpha 4                                         |
| Abca1                     | 4.46E-154 | ATP-binding cassette, sub-family A (ABC1), member 1                      | Tppp3                       | 4.37E-98  | tubulin polymerization-promoting protein family member 3           |
| AI747448                  | 1.93E-148 | expressed sequence AI747448                                              | Hapln1                      | 4.58E-97  | hyaluronan and proteoglycan link protein 1                         |
| Tnfrsf23                  | 5.22E-146 | tumor necrosis factor receptor superfamily, member 23                    | Col4a6                      | 1.98E-88  | collagen, type IV, alpha 6                                         |
| Slc25a37                  | 8.92E-135 | solute carrier family 25, member 37                                      | Insrr                       | 3.94E-84  | insulin receptor-related receptor                                  |
| Prss22                    | 1.00E-127 | protease, serine, 22                                                     | Itih2                       | 3.18E-80  | inter-alpha trypsin inhibitor, heavy chain 2                       |
| Ltf                       | 1.23E-118 | lactotransferrin                                                         | Esrrg                       | 8.16E-80  | estrogen-related receptor gamma                                    |
| Lox                       | 4.06E-117 | lysyl oxidase                                                            | Fmo5                        | 2.53E-78  | flavin containing monooxygenase 5                                  |
| Dhrs9                     | 2.87E-116 | dehydrogenase/reductase (SDR family) member 9                            | Mapk15                      | 7.55E-78  | mitogen-activated protein kinase 15                                |
| Duoxa2                    | 3.13E-113 | dual oxidase maturation factor 2                                         | Cybrd1                      | 7.99E-78  | cytochrome b reductase 1                                           |
| Hsd11b1                   | 7.75E-111 | hydroxysteroid 11-beta dehydrogenase 1                                   | Naaladl1                    | 1.97E-74  | N-acetylated alpha-linked acidic dipeptidase-like 1                |

**Supplementary Table S5. Top 20 up-regulated and down-regulated differentially expressed genes in infected susceptible and resistant congenic mice based on DESeq2.**



## Supplementary Table

| Top 20 Up-regulated Genes |          |                                                                               | Top 20 Down-regulated Genes |          |                                                              |
|---------------------------|----------|-------------------------------------------------------------------------------|-----------------------------|----------|--------------------------------------------------------------|
| Symbol                    | P-value  | Name                                                                          | Symbol                      | P-value  | Name                                                         |
| Gm830                     | 8.73E-41 | predicted gene 830                                                            | Slc26a3                     | 4.23E-60 | solute carrier family 26, member 3                           |
| Rspo2                     | 3.50E-36 | R-spondin 2 homolog (Xenopus laevis)                                          | Tmigd1                      | 3.08E-33 | transmembrane and immunoglobulin domain containing 1         |
| Rnf43                     | 2.84E-20 | ring finger protein 43                                                        | Agr2                        | 5.10E-19 | anterior gradient 2                                          |
| Mettl7a3                  | 6.09E-18 | methyltransferase like 7A3                                                    | Car4                        | 2.87E-17 | carbonic anhydrase 4                                         |
| Pvrl4                     | 4.97E-16 | poliovirus receptor-related 4                                                 | Slc51b                      | 2.87E-17 | solute carrier family 51 beta subunit                        |
| Alox12                    | 9.38E-16 | arachidonate 12-lipoxygenase                                                  | Ankdd1b                     | 2.96E-16 | ankyrin repeat and death domain containing 1B                |
| Sptbn2                    | 6.45E-14 | spectrin beta, non-erythrocytic 2                                             | Sult1c2                     | 5.08E-16 | sulfotransferase family, cytosolic, 1C, member 2             |
| Mycl1                     | 1.22E-13 | v-myc myelocytomatosis viral oncogene homolog 1, lung carcinoma derived       | Mep1b                       | 3.37E-15 | meprin 1 beta                                                |
| Chodl                     | 2.46E-13 | chondrolectin                                                                 | Tmem181c-ps                 | 1.05E-12 | transmembrane protein 181C, pseudogene                       |
| Spns2                     | 2.93E-13 | spinster homolog 2                                                            | Tat                         | 1.39E-11 | tyrosine aminotransferase                                    |
| Tmprss13                  | 2.71E-12 | transmembrane protease, serine 13                                             | Clca6                       | 1.39E-11 | chloride channel calcium activated 6                         |
| Ephb3                     | 1.57E-11 | Eph receptor B3                                                               | Kif5c                       | 1.56E-11 | kinesin family member 5C                                     |
| Axin2                     | 1.03E-10 | axin2                                                                         | 6430548M08Rik               | 1.70E-11 | RIKEN cDNA 6430548M08 gene                                   |
| Jun                       | 3.15E-10 | Jun oncogene                                                                  | Ildr1                       | 1.30E-10 | immunoglobulin-like domain containing receptor 1             |
| Wfikkn2                   | 7.03E-10 | WAP, follistatin/kazal, immunoglobulin, kunitz and netrin domain containing 2 | Zgl6                        | 1.94E-10 | zymogen granule protein 16                                   |
| Lrrc66                    | 1.31E-09 | leucine rich repeat containing 66                                             | Nefl                        | 2.07E-10 | neurofilament, light polypeptide                             |
| Trim29                    | 5.87E-09 | tripartite motif-containing 29                                                | Kcnk6                       | 2.90E-10 | potassium inwardly-rectifying channel, subfamily K, member 6 |
| Foxq1                     | 9.97E-09 | forkhead box Q1                                                               | Sgk2                        | 3.80E-10 | serum/glucocorticoid regulated kinase 2                      |
| Tmem132c                  | 1.18E-08 | transmembrane protein 132C                                                    | Scgn                        | 2.48E-09 | secretagogin, EF-hand calcium binding protein                |
| Nfe2l3                    | 1.43E-08 | nuclear factor, erythroid derived 2, like 3                                   | Hes2                        | 2.54E-09 | hairy and enhancer of split 2 (Drosophila)                   |

**Supplementary Table S6. Top 20 up-regulated and down-regulated differentially expressed genes in infected susceptible mice compared to infected resistant congenic mice based on DESeq2.**
